# 1 **Dengue Vaccine Effectiveness: Results from a Six-Year Population-Based** 2 **Cohort Study in Southern Brazil**

3 **Keywords:** dengue, tetravalent dengue vaccine, vaccine effectiveness, population-based cohort,  
4 Brazil

5 **Running title:** Dengue vaccine effectiveness in Southern Brazil

6 Karin Regina Luhm<sup>a</sup>, Silvia Emiko Shimakura<sup>a</sup>, Sonia Mara Raboni<sup>a</sup>, Magda Clara Vieira da Costa-  
7 Ribeiro<sup>a</sup>, Fredi Alexander Diaz-Quijano<sup>b</sup>, Angela Maron de Mello<sup>c</sup>, Lineu Roberto da Silva<sup>a</sup>,  
8 Marilene da Cruz Magalhães Buffon<sup>a</sup>, Eliane Mara Cesário Pereira Maluf<sup>a</sup>, Gabriel Graeff<sup>d</sup>, Clara  
9 Preto<sup>a</sup>, Gustavo Araújo de Almeida<sup>a</sup>, Gabriela Amanda de Sousa<sup>a</sup>, Elias Teixeira Krainski<sup>a</sup>, Allan  
10 Arnold Evans<sup>a</sup>, Denise Siqueira de Carvalho<sup>a\*</sup>

11 a - Universidade Federal do Paraná (UFPR), Curitiba, Brazil

12 Address: Rua Padre Camargo, 280 - Alto da Glória, Curitiba - PR, 80060-240, Brazil

13 b - Universidade de São Paulo (USP), São Paulo, Brazil

14 Address: Av. Dr. Arnaldo, 715 - São Paulo/SP, 01246-904, Brazil

15 c – Health Ministry, Curitiba, Brazil

16 Address: Av. Cândido Lopes, 208, 8º andar, sala 804 – Centro, Curitiba – PR, 80020-060,  
17 Brazil

18 d - Faculdade UNISE, Campo Largo, Paraná, Brazil

19 Address: R. XV de Novembro, 1609 - Centro, Campo Largo - PR, 83601-030, Brazil

20 **\*Corresponding author:**

21 Denise Siqueira de Carvalho<sup>a</sup> (PhD Preventive Medicine – FM/USP)

22 Address: Rua Padre Camargo, 280 - Alto da Glória, Curitiba - PR, 80060-240, Brazil

23 Universidade Federal do Paraná (UFPR), Curitiba, Brazil

24 Phone number: +55 41 999710498 Email: [denisecarvalho@ufpr.br](mailto:denisecarvalho@ufpr.br)

NOTE: This preprint reports new research that has not been certified by peer review and should not be used to guide clinical practice.

25 **Author Contributions Statement**

26 **K.R.L., S.E.S., S.M.R.: conceptualization, methodology, data collection, analysis,**  
27 **interpretation, supervision, article revising and editing. M.C.V.C-R., F.A.D-Q analysis,**  
28 **interpretation and article drafting. A.M.M, L.R.S., M.C.M.B., E.M.C.P.M.: methodology, data**  
29 **collection and article drafting. G.G., E.T.K.: data curation and analysis. C.P., G.A.A., G.A.S.,**  
30 **A.A.E.: investigation, article drafting and article editing. D.S.C: conceptualization,**  
31 **methodology, analysis, interpretation, and article revising and editing, funding acquisition and**  
32 **project administration. All authors approved the final version of the manuscript.**

33 **ABSTRACT**

34 The alarming growth of dengue worldwide and its social and economic impact have demanded more  
35 effective responses for its prevention and control. Currently, the first vaccine approved in Brazil for  
36 its prevention, Dengvaxia®, was administered to a target population of around 500,000 residents in  
37 southern Brazil. This study reports its effectiveness after a six-year follow-up period from August 2016  
38 to July 2022. Dengue vaccination campaign was carried out in a target population of individuals aged  
39 15–27 in 28 municipalities and 9–44 years in the other two. In this population-based cohort study,  
40 exposure to the vaccine included groups with different numbers of doses and adherence to the complete  
41 schedule. The primary outcome was probable dengue case. Other endpoints included laboratory-  
42 confirmed dengue, serotype, dengue with warning signs or severe illness, and hospitalization.  
43 Approximately 60.4% of the participants received at least one vaccine dose. A total of 50,658 probable  
44 dengue cases (PDC) were notified of which 15,131 were laboratory-confirmed dengue cases. Overall  
45 effectiveness for at least one dose was 33.7% (95% CI: 32.5–34.9) for PDC and 20.1% (95%  
46 confidence interval [CI]: 17.1–22.9) for laboratory-confirmed cases. Greater vaccine effectiveness was  
47 observed in older individuals and for the DENV-4 and DENV-1 serotypes. The vaccine showed no  
48 effectiveness against DENV-2; no DENV-3 cases occurred. A lower hospitalization rate was observed  
49 among the vaccinated group. Differences in the incidence of severe dengue cases and warning signs  
50 could not draw a definite conclusion. Vaccination was associated with a one-third reduction in the  
51 incidence of probable dengue cases. By serotypes, the reduction was significant only for DENV-1 and  
52 DENV-4.

53 **Author Summaries**

54 Outcomes resulting from dengue mass vaccination remains limited.  
55 Study on Dengvaxia®'s effectiveness in a target population of 501,000 with unknown serostatus.  
56 Dengue risk reduction was significant for DENV-1 and DENV-4.

57

## 58 **Introduction**

59 Vector-borne diseases, including dengue, cause approximately 17% of infectious diseases  
60 worldwide. It is the fastest-spreading viral infection caused by mosquito bites, endangering 3.97 billion  
61 people in 128 countries on nearly every continent, with approximately 400 million infections annually  
62 [1]. Incidence rates are highest in South Asia, followed by Southeast Asia, the Caribbean, tropical  
63 Latin America, and Central Latin America [2]. In 2022, the Americas reported 2.8 million dengue  
64 cases, of which 82% were from Brazil [3]. In the same year, Paraná was Brazil's third most affected  
65 state, with an incidence rate of 1,413.6 per 100,000 inhabitants [4].

66 There is no specific treatment for dengue, and control strategies for its main vector, *Aedes*  
67 *aegypti*, have presented some limitations [5]. Thus, a vaccine is needed as part of an integrated  
68 approach to prevent and control dengue. The first licensed dengue vaccine, Dengvaxia<sup>®</sup>, developed  
69 by Sanofi, was introduced in Brazil in December 2015 for individuals aged 9–44 years [6] as a three-  
70 dose regimen vaccine with six-month intervals between doses. In clinical trials involving over 30,000  
71 subjects, its overall efficacy against virologically confirmed symptomatic dengue was 65.6% for  
72 participants of 9 years of age or older after a 25-month follow-up period. Its efficacy also varied with  
73 respect to serotype (DENV-1: 58.4%; DENV-2: 47.1%; DENV-3: 73.6%; DENV-4: 83.2%) [7–9].

74 This dengue vaccine has been approved in over 20 countries. However, large-scale vaccination  
75 campaigns were only organized in Brazil (Paraná state) and the Philippines [6]. The Paraná State  
76 Department of Health (SESA/PR) vaccinated free of charge over 300,000 people in 30  
77 municipalities highly affected by dengue between 2016 and 2018, regardless of previous serological  
78 status [10], and its effect has been assessed [11]. Hence, we assessed the dengue vaccine's effectiveness  
79 in a population-based cohort six years following the launch of the vaccination initiative in Paraná,  
80 Brazil.

## 81 **Methods**

82 *Study design and participants*

83 This six-year population-based cohort study focused on a dengue-vaccinated target population  
84 residing in 30 municipalities within Paraná state, Brazil, spanning from August 2016 to July 2022.

85 Paraná is in Brazil's southern region and dengue vaccination was carried out in the municipalities  
86 chosen based on epidemiological criteria. The target population in 28 municipalities comprised  
87 individuals aged 15–27 and 9–44 years in other two. The vaccination roll-out consisted of five  
88 consecutive phases (Table 1) from August 13, 2016, to December 20, 2018, with intervals of  
89 approximately six months [10].

90 Table 1 Dengue vaccination timeline in Paraná, Brazil from 2016 to 2018

| Phase           | Doses administered                          | Vaccination period                |
|-----------------|---------------------------------------------|-----------------------------------|
| 1 <sup>st</sup> | 1 <sup>st</sup> dose                        | August 13 to September 24, 2016   |
| 2 <sup>nd</sup> | 1 <sup>st</sup> dose / 2 <sup>nd</sup> dose | March 1 to April 7, 2017          |
| 3 <sup>rd</sup> | 2 <sup>nd</sup> dose / 3 <sup>rd</sup> dose | September 20 to November 11, 2017 |
| 4 <sup>th</sup> | 2 <sup>nd</sup> dose / 3 <sup>rd</sup> dose | March 20 to June 29, 2018         |
| 5 <sup>th</sup> | 3 <sup>rd</sup> dose                        | November 5 to December 20, 2018   |

91 Source: SESA/PR

92 Dengue is a mandatory notification disease, and suspected and confirmed cases nationwide are  
93 registered in the National Reportable Disease Information System (Sinan) [12]. Since 1995, dengue  
94 has been reported in Paraná, and in recent years, the disease incidence has been the highest ever  
95 observed, mainly between 2015–2016 and 2019-2020. Despite this, there is no data on the  
96 seroprevalence of the disease in this population. Dengue cases in the 30 municipalities showed a  
97 similar pattern to that observed at the state level, with these municipalities accounting for 47.6% of all  
98 dengue cases between 2008 and 2016. Four serotypes have circulated in the region since 1995, and  
99 DENV-1 has been the most prevalent serotype, except for 2019-2020, in which DENV-2 surpassed  
100 the values previously observed for serotype 1 (Figure 1).

**Figure 1. Distribution of probable dengue cases in the state of Paraná and the 30 selected municipalities based on the epidemiological weeks (A), and proportion of dengue serotypes identified in the state of Paraná, Brazil (B), between 2008 and 2019.**

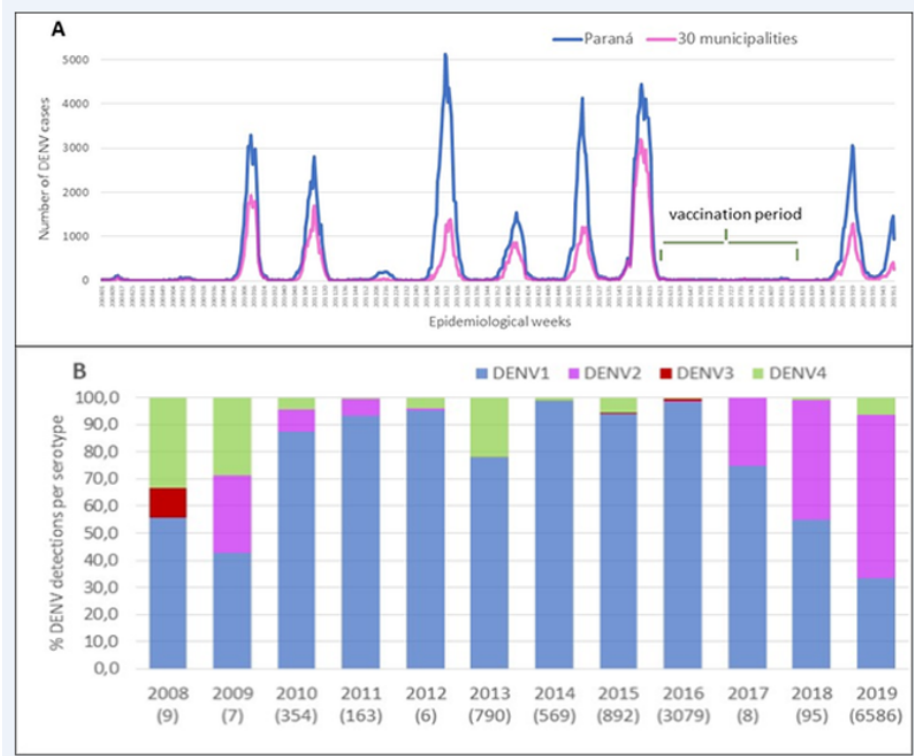

Source: **National Epidemiological Surveillance System (Sinan)**

101

102

103

104

105

106

107

108

### *Procedures*

109

110

111

112

113

114

The study population was derived from the population defined by SESA/PR to receive public vaccination and included about 500,000 individuals [10]. These individuals were divided into the vaccinated group, constituted of those who had received any number of dengue vaccine doses, and the non-vaccinated group, comprised of individuals who were eligible for vaccination but were not listed in the vaccinated database. The reference population was obtained by subtracting the number of vaccinated individuals from the target population size.

Exposure variables (vaccinations) were obtained from the SESA/PR vaccine database. They were defined based on the number of vaccine doses received (one, two, or three). A subset of individuals who received three doses in consecutive phases, with an interval of  $\geq 160$  days between doses, was considered to have the complete regimen as recommended and was called the compliance group.

The primary outcome was probable dengue cases (PDC) constituted either by clinical-

115 epidemiological criteria and/or laboratory tests. Secondary outcomes were defined as: i) laboratory-  
 116 confirmed dengue; ii) confirmed cases with identified serotypes (DENV-1, 2, 3, and 4); iii) cases with  
 117 warning signs or severe disease identified based on PDC; and iv) dengue hospitalizations with warning  
 118 signs or severe disease identified based on PDC.

119 Control variables included sex, age group, and municipality of residence, which may be  
 120 associated with adherence to the vaccination schedule and disease risk. Age groups were categorized  
 121 into 9–14, 15–27, and 28–44 years according to the following criteria: a) individuals aged 15–27 years  
 122 constituted the target population for vaccination in all 30 municipalities; b) individuals aged 9–14 and  
 123 28–44 years constituted the target population for vaccination in only two municipalities.

124 To identify outcomes in vaccinated patients, the Sinan probabilistic record linkage (PRL)  
 125 procedure was performed in the SESA/PR vaccination database using OpenRecLink 3.1 [14]. The  
 126 PRL, with an accuracy of 94.1% (95% CI: 91.9–95.7%) and a Kappa concordance index of 96.1%  
 127 (95% CI: 95.4–96.8%), was validated in a previous study (unpublished).

128 According to Table 2, we provided different start times for each exposure variable to define  
 129 follow-up time in the cohort. Among the vaccinated individuals, follow-up was initiated 30 days after  
 130 the first vaccine dose was administered (Table 2). Among the non-vaccinated individuals, follow-up  
 131 was initiated 30 days after the end of the vaccination phase, when approximately 75% of vaccinated  
 132 individuals had received their respective doses.

Table 2 Initial follow-up date according to the exposure variables for the vaccinated and non-vaccinated groups

| Exposure variable                           | Group                                  |                                                                             |
|---------------------------------------------|----------------------------------------|-----------------------------------------------------------------------------|
|                                             | Vaccinated                             | Non-vaccinated                                                              |
| <b>Any number of doses or a single dose</b> | 30th day after the first vaccine dose  | October 23, 2016 (30 days after the end of the first phase of vaccination)  |
| <b>Two doses</b>                            | 30th day after the second vaccine dose | May 7, 2017 (30 days after the end of the second phase of vaccination).     |
| <b>Three doses or compliant</b>             | 30th day after the third vaccine dose  | December 11, 2017 (30 days after the end of the third phase of vaccination) |

133

134 For analytical purposes, the follow-up duration for each participant was extended up to the date

135 of their first confirmed dengue episode in case of disease occurrence. For those who remained dengue-  
136 free, the predetermined endpoint for follow-up was set at July 31, 2022, with no recorded losses  
137 considered in this group.

#### 138 *Case definitions*

139 Dengue is a mandatorily reportable disease, and the system relies on the notification of all  
140 suspected cases of the disease at public and private health facilities based on the initial clinical  
141 diagnosis (not laboratory confirmed) [12,15]. The primary outcome was a probable case of dengue  
142 (PDC), which includes clinical-epidemiological criteria or laboratory confirmation [13,15], as it is a  
143 more sensitive criterion for the diagnosis of dengue and is helpful in the context of epidemiological  
144 surveillance of the disease. Laboratory-confirmed dengue was defined as PCR, NS1, or IgM positive  
145 test. IgM result was only considered if performed 90 days after any vaccine dose for those vaccinated.

#### 146 *Statistical analysis*

147 Incidence rates per 10,000 person-years (IR/10<sup>4</sup>py) and incidence rate ratios (IRR) were  
148 calculated for both primary outcomes under consideration. These measures were determined for  
149 individuals who received at least one, two, or three vaccine doses or complete regimen as  
150 recommended compared to non-vaccinated individuals. Other secondary outcomes were evaluated in  
151 patients who received at least one dose.

152 Poisson regression was used to adjust for confounders, with the time of follow-up used as an  
153 offset. Age, sex, and municipality were included in the models. Individuals aged 9–14 and 28–44  
154 years (11.5%) were excluded, except when specific analysis by age group was performed, as they were  
155 restricted to only two municipalities.

156 Vaccine effectiveness and 95% confidence intervals (95% CIs) were calculated using the  
157 formula:  $Effectiveness = [1 - IRR_a] \times 100$  (eq. 1)  
158 where IRR<sub>a</sub> is the adjusted incidence rate ratio. Statistical analyses were performed using R 2020  
159 (version 4.0.2) and Stata® (version 15.1) [16,17]. Absolute risk reduction (ARR) and the number



160 necessary for vaccine (NNV) were also calculated and presented for each exposure regimen [18].

161 For sensitivity analysis, the effectiveness of PDC was evaluated considering the period from  
162 2019 onwards.

163 This study was approved by the Research Ethics Committee of the Federal University of Paraná  
164 (N# 2,308,662) and registered in the institution's Integrated Agreement Management System under  
165 Process number 23075.040144/2019-49 and published in the DOU on 04/June/ 2020.

## 166 **Results**

167 This cohort consisted of 501,208 individuals from the vaccination's target population program,  
168 302,603 (60.4%) individuals who received at least one vaccine dose and 198,605 (39.6%)  
169 unvaccinated individuals. A total of 142,687 individuals received the three planned doses, among  
170 which 122,564 met the compliance criteria.

171 Demographic characteristics and vaccination-related aspects are shown in Table 3. A higher  
172 percentage of men received at least one vaccine dose (51.1%) and women had a higher compliance  
173 rate (52.4%). The highest frequency of dengue notifications was recorded in 2020 (44.9%).

Table 3. Demographic characteristics, exposure, and dengue notifications in the target population in the 30 municipalities in Paraná from epidemiological week 33/2016 to 52/2019

| Characteristic         | Vaccinated       |              |                  |              | Non-vaccinated   |              | Total            |              |
|------------------------|------------------|--------------|------------------|--------------|------------------|--------------|------------------|--------------|
|                        | <i>Compliant</i> |              | Total vaccinated |              |                  |              |                  |              |
|                        | (Total: 122,614) |              | (Total: 302,603) |              | (Total: 198,605) |              | (Total: 501,208) |              |
|                        | n                | %            | n                | %            | n                | %            | n                | %            |
| <b>Sex</b>             |                  |              |                  |              |                  |              |                  |              |
| Male                   | 59,914           | 48.9         | 158,654          | 52.4         | 90,391           | 45.5         | 249,045          | 49.7         |
| Female                 | 62,700           | 51.1         | 143,949          | 47.6         | 108,214          | 54.5         | 252,163          | 50.3         |
| <b>Age group</b>       |                  |              |                  |              |                  |              |                  |              |
| 9 to 14*               | 7,980            | 6.5          | 14,409           | 4.8          | 4,894            | 2.5          | 19,303           | 3.9          |
| 15 to 19               | 48,718           | 39.7         | 111,993          | 37.0         | 56,354           | 28.4         | 168,347          | 33.6         |
| 20 to 24               | 32,776           | 26.7         | 94,124           | 31.1         | 79,822           | 40.2         | 173,946          | 34.7         |
| 25 to 27               | 16,813           | 13.7         | 48,509           | 16.0         | 52,811           | 26.6         | 101,320          | 20.2         |
| 28 to 44*              | 16,327           | 13.3         | 33,568           | 11.1         | 4,724            | 2.4          | 38,292           | 7.6          |
| <b>Cohort group</b>    |                  |              |                  |              |                  |              |                  |              |
| First                  | 104,484          | 85.2         | 205,927          | 68.1         | 198,605          | 100.0        | 404,532          | 80.7         |
| Second                 | 18,130           | 14.8         | 96,676           | 31.9         | ..               | ..           | 96,676           | 19.3         |
| <b>Number of doses</b> |                  |              |                  |              |                  |              |                  |              |
| 3 doses                | 122,614          | 100.0        | 142,700          | 47.2         | ..               | ..           | 142,700          | 28.5         |
| 2 doses                | 0                | ..           | 78,337           | 25.9         | ..               | ..           | 78,337           | 15.6         |
| 1 dose                 | 0                | ..           | 81,566           | 27.0         | ..               | ..           | 81,566           | 16.3         |
| None                   | 0                | ..           | 0                | ..           | 198,605          | 100.0        | 198,605          | 39.6         |
| <b>Notifications</b>   |                  |              |                  |              |                  |              |                  |              |
| 2016                   | 349              | 7.9          | 935              | 8.4          | 1,029            | 7.8          | 1,964            | 8.1          |
| 2017                   | 831              | 18.7         | 2,280            | 20.6         | 2,253            | 17.1         | 4,533            | 18.7         |
| 2018                   | 533              | 12.0         | 1,281            | 11.6         | 1,584            | 12.0         | 2,865            | 11.8         |
| 2019                   | 2,729            | 61.4         | 6,591            | 59.4         | 8,300            | 63.0         | 14,891           | 61.4         |
| <b>Total</b>           | <b>4,442</b>     | <b>100.0</b> | <b>11,087</b>    | <b>100.0</b> | <b>13,166</b>    | <b>100.0</b> | <b>24,253</b>    | <b>100.0</b> |

The denominator of the proportions was the total number of individuals in each group (compliant, vaccinated, non-vaccinated, and total cohort). Total vaccinated includes individuals who received any number of vaccine doses. \* For the municipalities of Assaí and Paranaguá, the study population was only composed of the age groups 9–14 and 28–44 years.

174

175

176

177

178

Among the 90,373 notifications recorded from 2016–2022, PDC numbered 50,658, of which 24,219 (47.8%) in the vaccinated group (Table 4). A total of 15,131 (16.7%) were laboratory-confirmed cases with 8,364 (55.3%) in the vaccinated group. Warning signs were identified in 912 cases, with 520 (57.0%) in the vaccinated group.

Table 4. Probable dengue cases (PDC) in the target population in 30 municipalities in Paraná.

| Characteristics                      | Vaccinated |      | Non-vaccinated |       | Total      |      |
|--------------------------------------|------------|------|----------------|-------|------------|------|
|                                      | No. 24,219 |      | No. 26,439     |       | No. 50,658 |      |
|                                      | N          | %    | N              | %     | n          | %    |
| <b>Sex</b>                           |            |      |                |       |            |      |
| Male                                 | 11,969     | 49.4 | 12,027         | 45.5  | 23,996     | 47.4 |
| Female                               | 12,250     | 50.6 | 14,412         | 54.5  | 26,662     | 52.6 |
| <b>Age group</b>                     |            |      |                |       |            |      |
| 9 to 14*                             | 745        | 3.1  | 198            | 0.7   | 943        | 1.9  |
| 15 to 19                             | 10,352     | 42.7 | 8,085          | 30.6  | 18,437     | 36.4 |
| 20 to 24                             | 7,520      | 31.1 | 10,002         | 37.8  | 17,522     | 34.6 |
| 25 to 27                             | 3,648      | 15.1 | 7,085          | 26.8  | 10,733     | 21.2 |
| 28 to 44*                            | 1,954      | 8.1  | 1,069          | 4.0   | 3,023      | 6.0  |
| <b>Number of doses</b>               |            |      |                |       |            |      |
| None                                 | 0          | 0    | 26,439         | 100.0 | 26,439     | 52.2 |
| 1 dose                               | 6,487      | 26.8 | 0              | -     | 6,487      | 12.8 |
| 2 doses                              | 6,176      | 25.5 | 0              | -     | 6,176      | 12.2 |
| 3 doses                              | 11,556     | 47.7 | 0              | -     | 11,556     | 22.8 |
| <b>Laboratory confirmed cases</b>    |            |      |                |       |            |      |
| 2016                                 | 22         | 0.1  | 35             | 0.1   | 57         | 0.1  |
| 2017                                 | 105        | 0.4  | 219            | 0.9   | 324        | 0.6  |
| 2018                                 | 39         | 0.1  | 40             | 0.2   | 79         | 0.2  |
| 2019                                 | 1,463      | 5.5  | 1,409          | 5.8   | 2,872      | 5.7  |
| 2020                                 | 2,765      | 10.5 | 4,082          | 16.9  | 6,847      | 13.5 |
| 2021                                 | 1,349      | 5.1  | 1,502          | 6.2   | 2,851      | 5.6  |
| 2022                                 | 1,024      | 3.9  | 1,077          | 4.4   | 2,101      | 4.1  |
| <b>Probable dengue cases</b>         |            |      |                |       |            |      |
| 2016                                 | 51         | 0.2  | 28             | 0.1   | 79         | 0.2  |
| 2017                                 | 274        | 1.1  | 145            | 0.5   | 419        | 0.8  |
| 2018                                 | 62         | 0.3  | 45             | 0.2   | 107        | 0.2  |
| 2019                                 | 2,343      | 9.7  | 2,378          | 9.0   | 4,721      | 9.3  |
| 2020                                 | 15,478     | 63.9 | 16,598         | 62.8  | 32,076     | 63.3 |
| 2021                                 | 2,926      | 12.1 | 3,208          | 12.1  | 6,134      | 12.1 |
| 2022                                 | 3,085      | 12.7 | 4,037          | 15.3  | 7,122      | 14.1 |
| <b>Classification of cases</b>       |            |      |                |       |            |      |
| Dengue                               | 23,680     | 97.8 | 26,027         | 98.4  | 49,707     | 98.1 |
| Warning signs                        | 520        | 2.1  | 392            | 1.5   | 912        | 1.8  |
| Severe dengue                        | 19         | 0.1  | 20             | 0.1   | 39         | 0.1  |
| <b>Hospitalization</b>               |            |      |                |       |            |      |
| Dengue                               | 389        | 1.6  | 318            | 1.2   | 707        | 1.4  |
| Warning signs                        | 214        | 0.9  | 174            | 0.7   | 388        | 0.8  |
| Severe dengue                        | 16         | 0.1  | 18             | 0.1   | 34         | 0.1  |
| Total identified                     | 619        | 2.6  | 510            | 1.9   | 1,129      | 2.2  |
| <b>Laboratory dengue confirmed**</b> |            |      |                |       |            |      |
| PCR                                  | 1288       | 5.3  | 1197           | 4.5   | 2485       | 4.9  |
| NS1                                  | 4265       | 17.6 | 2848           | 10.8  | 7113       | 14.0 |
| IgM                                  | 2811       | 11.6 | 2722           | 10.3  | 5533       | 10.9 |
| Any test (total)                     | 8364       | 34.5 | 6767           | 25.6  | 15131      | 29.9 |
| <b>Identified serotypes</b>          |            |      |                |       |            |      |
| DENV-1                               | 342        | 1.4  | 502            | 1.9   | 844        | 1.7  |
| DENV-2                               | 936        | 3.9  | 571            | 2.2   | 1507       | 3.0  |
| DENV-4                               | 14         | 0.1  | 123            | 0.5   | 137        | 0.3  |
| Total identified                     | 1292       | 5.3  | 1196           | 4.5   | 2488       | 4.9  |

The denominator of the proportions was the total number of probable dengue cases in each group (vaccinated, non-vaccinated, and total cases). Total vaccinated: Individuals who received any number of vaccine doses. \*The 9–14 years and 28–44 years age groups constituted the study population only for the municipalities of Assaí and Paranaguá. \*\* Prioritization of the most specific Laboratory test in decreasing order i.e., PCR, NS1, and IgM.

179

180

Thirty-nine severe cases were observed among PDC, 19 in the vaccinated group and 20 in the

181 non-vaccinated. Dengue-related deaths were reported in both groups during the study period, 5 cases  
 182 in the vaccinated and 14 occurrences in the non-vaccinated (IR 0.39; 95% CI: 0.14-1.08). Of the 1,129  
 183 hospitalizations, 619 (54.0%) were in the vaccinated group, of which 16 (2.6%) involved severe forms,  
 184 while of the 510 hospitalizations in the non-vaccinated group, 18 (3,5%) were severe.

185 Vaccine effectiveness on PDC ranged from 31.5% (95% CI: 29.5–33.5) to 35.1% (95% CI: 33.3–  
 186 36.8) among those with two doses and those with compliance, respectively (Table 5).

Table 5. Number of probable dengue cases, incidence rates in 10, 000 person-year, crude and adjusted incidence rate ratios, vaccine effectiveness, absolute risk reduction and number needed to vaccinate according to exposure characteristics and primary outcome in 30 municipalities in Paraná.

| No.                 | IR    | No.                   | IR    | IRR <sub>c</sub> (95% CI) | IRR <sub>a</sub> (95% CI) | Vaccine Effectiveness (95% CI) | ARR <sup>***</sup> (%) | NNV <sup>****</sup> |
|---------------------|-------|-----------------------|-------|---------------------------|---------------------------|--------------------------------|------------------------|---------------------|
| <b>Vaccinated**</b> |       | <b>Non-vaccinated</b> |       |                           |                           |                                |                        |                     |
| 21,520              | 154.9 | 25,172                | 242.0 | 0.640(0.628 to 0.652)     | 0.663(0.651 to 0.675)     | 33.7(32.5 to 34.9)             | 0.872                  | 115                 |
| <b>1 dose</b>       |       | <b>Non-vaccinated</b> |       |                           |                           |                                |                        |                     |
| 6,039               | 157.3 | 25,172                | 242.0 | 0.650(0.632 to 0.669)     | 0.655 (0.636 to 0.674)    | 34.5 (32.6 to 36.4)            | 0.847                  | 118                 |
| <b>2 doses</b>      |       | <b>Non-vaccinated</b> |       |                           |                           |                                |                        |                     |
| 5,623               | 175.1 | 25,103                | 267.5 | 0.655(0.636 to 0.674)     | 0.685(0.665 to 0.705)     | 31.5(29.5 to 33.5)             | 0.924                  | 108                 |
| <b>3 doses</b>      |       | <b>Non-vaccinated</b> |       |                           |                           |                                |                        |                     |
| 9,858               | 195.6 | 25,039                | 303.0 | 0.645(0.631 to 0.661)     | 0.663(0.646 to 0.681)     | 33.7(31.9 to 35.4)             | 1.074                  | 93                  |
| <b>Compliance</b>   |       | <b>Non-vaccinated</b> |       |                           |                           |                                |                        |                     |
| 8,459               | 192.9 | 25,039                | 303.0 | 0.637(0.621 to 0.653)     | 0.649(0.632 to 0.667)     | 35.1(33.3 to 36.8)             | 1.101                  | 91                  |

\*IR = Incidence rate/10,000 person-year. IRR<sub>c</sub>: crude incidence rate ratio calculated using the ratio of incidence rates in each group; IRR<sub>a</sub>: incidence rate ratio adjusted by sex, 15–27 years age group, and municipality of residence; Vaccine Effectiveness was calculated using the adjusted incidence rate ratio in %. \*\* Vaccinated: individuals who received any number of vaccine doses. \*\*\*ARR = Absolute risk reduction. \*\*\*\*NNV = Number needed to vaccinate.

187

188 Based on laboratory- confirmed cases, overall effectiveness was 20.1 (95% CI: 17.1-22.9)  
 189 for at least one dose (Table 6). It ranged from 17.5 (95% CI:12,9–21.9) among those who received  
 190 two doses to 24.3% (95% CI: 20.1–28.2) for those with one dose.

Table 6. Number of laboratory confirmed dengue cases, incidence rates in 10, 000 person-year, crude and adjusted incidence rate ratios, vaccine effectiveness, absolute risk reduction and number needed to vaccinate according to exposure characteristics and primary outcome in 30 municipalities in Paraná.

| No.                 | IR   | No.                   | IR*  | IRR <sub>c</sub> (95% CI) | IRR <sub>a</sub> (95% CI) | Vaccine Effectiveness (95% CI) | ARR*** (%) | NNV**** |
|---------------------|------|-----------------------|------|---------------------------|---------------------------|--------------------------------|------------|---------|
| <b>Vaccinated**</b> |      | <b>Non-vaccinated</b> |      |                           |                           |                                |            |         |
| 6,869               | 51.4 | 6,074                 | 62.8 | 0.818(0.790 to 0.847)     | 0.799 (0.771 to 0.829)    | 20.1(17.1 to 22.9)             | 0.142      | 876     |
| <b>1 dose</b>       |      | <b>Non-vaccinated</b> |      |                           |                           |                                |            |         |
| 1,817               | 49.2 | 6,074                 | 62.8 | 0.783(0.743 to 0.826)     | 0.757 (0.718 to 0.799)    | 24.3 (20.1 to 28.2)            | 0.136      | 735     |
| <b>2 doses</b>      |      | <b>Non-vaccinated</b> |      |                           |                           |                                |            |         |
| 1,810               | 58.3 | 6,018                 | 68.7 | 0.849(0.805 to 0.895)     | 0.825(0.781 to 0.871)     | 17.5(12.9 to 21.9)             | 0.104      | 966     |
| <b>3 doses</b>      |      | <b>Non-vaccinated</b> |      |                           |                           |                                |            |         |
| 3,242               | 66.5 | 5,987                 | 77.2 | 0.861(0.825 to 0.899)     | 0.817(0.777 to 0.858)     | 18.3(14.2 to 22.3)             | 0.107      | 934     |
| <b>Compliance</b>   |      | <b>Non-vaccinated</b> |      |                           |                           |                                |            |         |
| 2,825               | 66.6 | 5,987                 | 77.2 | 0.863(0.825 to 0.903)     | 0.806(0.766 to 0.849)     | 19.4(15.1 to 23.4)             | 0.106      | 945     |

\*IR = Incidence rate/10,000 person-year. IRR<sub>c</sub>: crude incidence rate ratio calculated using the ratio of incidence rates in each group; IRR<sub>a</sub>: incidence rate ratio adjusted by sex, 15–27 years age group, and municipality of residence; Vaccine Effectiveness was calculated using the adjusted incidence rate ratio in %. \*\* Vaccinated: individuals who received any number of vaccine doses. \*\*\*ARR = Absolute risk reduction. \*\*\*\*NNV = Number needed to vaccinate.

191

192

193

194

195

196

197

198

199

Higher effectiveness was observed in the 28–44 age group (78.1%; 95% CI: 76.2–79.9%), irrespective of the number of vaccine doses (Table 7). Data for the 28–44 age group were limited to the municipalities of Paranaguá and Assaí. When vaccine effectiveness was stratified by serotype, it was found to be 51.9% (95% CI: 44.6–58.2) and 92.0% (95% CI: 86.2–95.4) for DENV-1 and DENV-4, respectively. No effectiveness was found for DENV-2 (-10.8%; 95% CI: -23.5–0.60), and no DENV-3 cases were reported. Hospitalization was reduced among the vaccinated group (16.5%; CI: 5.5 to 26.3). Dengue cases with warning signs and/or severe forms presented wide confidence intervals for effectiveness, and no definite conclusions may be drawn.

Table 7. Other secondary outcomes, incidence rates in 10, 000 person-year, crude and adjusted incidence rate ratios, vaccine effectiveness, absolute risk reduction and number needed to vaccinate according to exposure characteristics in 30 municipalities in Paraná.

|                                 | No.                 | IR    | No.                   | IR    | IRR <sub>c</sub> (95% CI) | IRR <sub>a</sub> (95% CI) | Vaccine Effectiveness (95% CI) | ARR*** (%) | NNT**** |
|---------------------------------|---------------------|-------|-----------------------|-------|---------------------------|---------------------------|--------------------------------|------------|---------|
| <b>Age groups</b>               | <b>Vaccinated**</b> |       | <b>Non-vaccinated</b> |       |                           |                           |                                |            |         |
| 9 to 14 years                   | 745                 | 91.9  | 198                   | 71.1  | 1.292(1.103 to 1.519)     | 1.090(0.928 to 1.281)     | -9.0(-28.1 to 7.2)             | -0.201     | -       |
| 15 to 27 years                  | 21,520              | 154.9 | 25,172                | 242.0 | 0.640(0.628 to 0.652)     | 0,672((0.660 to 0.685)    | 32.8 (31.5 to 34.0)            | 0.872      | 115     |
| 28 to 44 years                  | 1,954               | 103.4 | 1,069                 | 425.6 | 0.243(0.225 to 0.262)     | 0,219((0.201 to 0.238)    | 78.1 (76.2 to 79.9)            | 3.222      | 31      |
| <b>Serotypes</b>                | <b>Vaccinated**</b> |       | <b>Non-vaccinated</b> |       |                           |                           |                                |            |         |
| DENV-1                          | 333                 | 2.5   | 495                   | 5.2   | 0.485(0.420 to 0.558)     | 0.481(0.418 to 0.554)     | 51.9(44.6 to 58.2)             | 0.027      | 4       |
| DENV-2                          | 836                 | 6.4   | 546                   | 5.8   | 1.102(0.988 to 1.230)     | 1.108(0.994 to 1.235)     | -10.8(-23.5 to 0.60)           | 0.006      | 17      |
| DENV-4                          | 14                  | 0.1   | 123                   | 1.3   | 0.082(0.044 to 0.143)     | 0.080(0.046 to 0.139)     | 92.0(86.2 to 95.4)             | 0.012      | 8       |
| <b>Clinical characteristics</b> | <b>Vaccinated**</b> |       | <b>Non-vaccinated</b> |       |                           |                           |                                |            |         |
| Alarm/Severe signs              | 509                 | 3,9   | 405                   | 4.3   | 0.905(0.792 to 1.033)     | 0.901(0.789 to 1.029)     | 9.9(-2.9 to 21.1)              | 0.004      | 25      |
| Severe dengue                   | 18                  | 0.14  | 20                    | 0.21  | 0.648(0.323 to 1.290)     | 0.588(0.304 to 1.137)     | 41.2(-13.7 to 69.6)            | 0.001      | 133     |
| Hospitalization                 | 537                 | 3.9   | 484                   | 4.7   | 0.830(0.733 to 0.941)     | 0.835(0.737 to 0.945)     | 16.5(5.5 to 26.3)              | 0.008      | 13      |

\*IR = Incidence rate/10,000 person-year. IRR<sub>c</sub>: crude incidence rate ratio calculated using the ratio of incidence rates in each group; IRR<sub>a</sub>: incidence rate ratio adjusted by sex and 15–27 years age group; Vaccine Effectiveness was calculated using the adjusted incidence rate ratio in %. \*\* Vaccinated: individuals who received any number of vaccine doses. \*\*\*ARR = Absolute risk reduction. \*\*\*\*NNT = Number needed to vaccinate.

200

201 In the sensitivity analysis, 21,252 cases were identified among individuals who received at least  
 202 one dose (IR 245.2/10<sup>4</sup>py) and 24,993 among non-vaccinated individuals (IR 399.1/10<sup>4</sup>py). The  
 203 measured vaccine effectiveness was 36.6% (95% CI: 35.4–37.8), similar to that obtained in the primary  
 204 analysis with PDC.

## 205 Discussion

206 In this study, we report the findings on the effectiveness of dengue vaccine, administered in a  
 207 large population-based cohort in 30 municipalities in Paraná, Southern Brazil [10], after six years of  
 208 monitoring. Effectiveness was higher among vaccinated individuals but lower than that obtained in  
 209 efficacy studies [9]. There was significant variability in vaccine effectiveness (VE) for the different  
 210 viral subtypes; VE was highest for DEN-4 and DEN-1 and lowest for DEN-2 (negative VE values).  
 211 The VE for serotype 3 could not be evaluated. The high prevalence of serotype 2 during the study  
 212 period may explain the differences in effectiveness observed here and previous clinical trials. PDC  
 213 was used as the primary endpoint as it better represents the real scenario of health services in  
 214 diagnosing dengue in countries like Brazil [18].

215 Since 2014, when Brazil adopted the WHO classification for dengue, PDC has been the

216 parameter used for dengue disease monitoring through epidemiological surveillance [15]. The signs  
217 and symptoms of dengue are well known by health professionals in endemic areas, favoring  
218 homogeneity in diagnosing the disease among vaccinated and non-vaccinated individuals.  
219 Furthermore, it is crucial to work with probable cases to respond to epidemics promptly, as case  
220 confirmation might be expensive and time-consuming [18].

221 The challenge in anti-dengue vaccine effectiveness studies is defining the primary endpoint.  
222 Ideally, this should be based on laboratory-confirmed disease. Laboratory confirmation, however,  
223 is not feasible in regions where thousands of suspected cases of dengue occur each year. Therefore,  
224 surveillance systems conclude reported cases based on clinical-epidemiological criteria and, anti-dengue  
225 vaccine efficacy studies should consider this criterion in their analysis of results.

226 Dengue notification processes were affected by the outbreak of the large-scale Zika virus in  
227 2014, which spread across the Pacific and reached Brazil, causing an explosive epidemic in South  
228 America. Zika infection can be misdiagnosed clinically as Dengue fever, reducing the accuracy of the  
229 clinical-epidemiological diagnosis. Moreover, the high genetic similarity between both viruses  
230 contributes to a substantial cross-reactivity in the antibody responses, compromising the results of  
231 point-of-care serological tests [19].

232 However, evaluating VE using laboratory methods exclusively presents limitations. Their use  
233 depends on the availability of infrastructure and laboratory capacity, making it challenging to offer  
234 and apply these procedures universally across municipalities and healthcare sites. Testing rates  
235 differed between municipalities, although there was no significant difference in laboratory testing  
236 between vaccinated and non-vaccinated individuals. According to De Smedt et al. [20], the laboratory  
237 criterion may introduce a differential misclassification bias by underestimating effectiveness, as  
238 observed by comparing PDC-based effectiveness estimates with PCRNS1 endpoints. Furthermore,  
239 adding IgM tests to the PDC for case identification ratified the primary outcome-based evaluation.

240 The “exposure to at least one dose” criterion seems the most appropriate because it represents



241 the natural condition of community intervention and reflects population adherence to multiple-dose  
242 vaccinations [10]. There was no difference between compliant individuals and those who received the  
243 three doses. However, further studies are needed to compare regimens with different numbers of doses,  
244 considering different epidemiological contexts [21], the prevalence of circulating serotypes [22], and  
245 the change in vaccine recommendations concerning previous seropositivity [23-25].

246 Effectiveness was higher in older age groups. Since there is a greater probability of previous  
247 dengue infection in older individuals, these data corroborate the results of efficacy studies [7,9,26,27].  
248 Although the basal seroprevalence of dengue in Paraná is unknown, a survey of dengue seroprevalence  
249 in a Brazilian city with a history of recurrent epidemics showed seropositivity values ranging from 63–  
250 75% in the 10–19 and 40–59 years age groups, respectively [28].

251 In line with the findings of efficacy studies (CYD14 and CYD15) [9], effectiveness varied  
252 according to viral serotype, with the highest values observed for DENV-4 and DENV-1. Notably,  
253 global vaccine effectiveness is significantly associated with serotype-related efficacy and depends  
254 on identified circulating serotypes, baseline serostatus, and dengue seroprevalence during the study  
255 period [22].

256 All four dengue serotypes have been circulating in Paraná since 1995, including areas where the  
257 vaccination campaign was carried out. Throughout the epidemic years spanning from 2008 to 2016,  
258 DENV-1 predominated, with minimal circulation of DENV-2 and DENV-4, and negligible presence  
259 of DENV-3. However, in 2017, there was an important upsurge in the circulation of DENV-2. In 2019–  
260 2020, it was responsible for two-thirds of cases, with a low DENV-1 (37%) and 4 (8%) circulation and  
261 the absence of DENV-3 observed. In 2021–2022, there was a rise in the DENV-1 detection, but DENV-  
262 2 was predominant [4].

263 The ineffectiveness of DENV-2 observed in the study population regardless of the serostatus was  
264 previously reported by Sabchareon et al. (2012) [29] in a phase IIb Dengvaxia<sup>®</sup> efficacy study in  
265 Thailand and subsequently in the CYD14 and CYD15 studies [30]. The antigenic incompatibility



266 between the vaccine virus (Asian-American genotype) and DENV-2 circulating in Southeast Asia  
267 (Asian genotype 1) and the unbalanced replication of vaccine viruses is likely responsible for the  
268 variability in vaccine effectiveness against different viral types. [31]. Furthermore, Heinen et al.  
269 studies indicate that, among children who were seronegative for DENV at baseline, impaired  
270 replication of DENV-4 from the tetravalent vaccine stimulates antibodies capable of neutralizing  
271 DENV-1 and DENV-3 *in vitro* but not protecting *in vivo* [32].

272 Further, studies have shown that viruses obtained directly from infected patients' plasma are  
273 significantly more infectious than those obtained from cell cultures. Although genotypically identical,  
274 DENVs obtained in cell lines are structurally immature and hypersensitive to neutralization by human  
275 antibodies compared to DENVs of an infected patient. This phenotypic difference is due to the mature  
276 state of the virion obtained in plasma samples compared with immature particles abundantly recovered  
277 in cell cultures. In this way, the antibodies induced by the vaccine efficiently neutralize the DENVs in  
278 cell culture assays, but they are ineffective in protecting the vaccinated individual [33].

279 Tetravalent dengue vaccines have been developed on the premise that intra-serotype variability  
280 does not interfere with vaccine-generated immune responses. However, in a recent analysis of the  
281 genetic diversity of DENV-2 pre-membrane (Pre-M) and envelope (E) proteins, its genotypic variants  
282 were evaluated, and were found to be neutralized in different ways by monoclonal antibodies and  
283 polyclonal sera derived from DENV-2-infected individuals. They also showed differential responses  
284 to antibodies induced by both monovalent dengue 2 vaccines and tetravalent vaccines [34]. Therefore,  
285 a high antigenic match between vaccine strains and circulating DENVs may be essential to achieve  
286 high vaccine efficacy [30].

287 A study conducted in Brazil using clinical samples from two cities of São Paulo in 2019, a new  
288 genotype, DENV-2 III BR4, was identified. It was probably introduced in Brazil in 2014 and has  
289 replaced other DENV-2 strains circulating in the region [35]. However, in this study, we did not  
290 perform a molecular analysis of DENV-2 strains circulating in the studied municipalities. Dengue

291 viruses are constantly under selective pressure, with the consequent emergence of new genotypes that  
292 progressively replace previous strains. Thus, the possibility of DENV immune response evasion should  
293 be considered in designing vaccines against dengue, which will probably systematically include viral  
294 genotypes circulating in the region at that time [22, 29–31, 34]. Therefore, viral genetic surveillance  
295 studies are required to understand better the relationship between the vaccine, viral evolution, and  
296 dengue virus genotypic variability.

297 Vaccine effectiveness was not statistically significant in cases with warning signs, although this  
298 outcome was not evaluated in efficacy studies. Few severe cases or warning signs resulted in low  
299 accuracy, limiting the assessment of these outcomes. However, it is essential to note that higher  
300 incidence rates of hospitalization due to severe cases and warning signs occurred in the non-  
301 vaccinated group. The increased risk of hospitalization observed among seronegative participants in  
302 follow-up studies led to recommending the vaccine only to seropositive individuals. [24,25]. The  
303 results obtained in this study refer to a population with no information about their previous disease  
304 situation. Despite this, hospitalization in dengue cases with alarming or severe signs did not pose a  
305 greater risk.

306 The present study was based on a mixed population of dengue-naïve and previously infected  
307 individuals when the vaccine was still indicated for all living in regions with high endemicity. From  
308 2018 onwards, the vaccine has only been indicated for people with previous dengue infection (i.e.,  
309 seropositive) [21]. Therefore, the replication of this study is precluded. Considering future scenarios  
310 of effectiveness evaluation, given that the vaccine's efficacy is increased in baseline seropositive  
311 subjects the results of studies limited to seropositive populations would potentially be improved  
312 compared to this present study.

313 This study was conducted using secondary databases, which have some limitations. The  
314 probabilistic matching of three bases minimized these limitations, allowing us to retrieve individual  
315 information with high agreement and accuracy, exclude duplicates, and complement data. Owing to

316 the data sources used, we could not individually assess the socioeconomic and educational  
317 characteristics of the target population, which may be associated with vaccine adherence, health care,  
318 and the risk of dengue infection. Studies on factors affecting the acceptance of the dengue vaccine  
319 have reported controversial data regarding the effects of socioeconomic status [36,37] and schooling  
320 [36–39]. Previous experiences with dengue may also constitute confounding factors, which lead to  
321 the vaccination of individuals at a higher risk of developing dengue [37]; however, other studies have  
322 not found this association [36,39]. In our study, conditioning for a municipality variable, age, sex,  
323 and other characteristics of the municipality are controlled, as they are associated with both the  
324 exposure variable (vaccine) and the outcome (notification), minimizing these biases.

325 The vaccine has proven effective in reducing the incidence of symptomatic dengue in clinical  
326 trials, but evidence is lacking regarding the impact it would have on epidemiological surveillance. In  
327 this study, we estimated a reduction in reported PDC, representing 33.7% among individuals who  
328 received at least one dose of the vaccine.

329 DENVs are heterogeneous and dynamic, with consequent implications for vaccine research.  
330 Recent human natural dengue infection studies have shown that only the presence of anti-DENV  
331 antibodies is not enough to define neutralization and protection, as not all neutralizing antibodies are  
332 equally protective to the same degree. Therefore, the quality and quantity of anti-DENV neutralizing  
333 antibodies are critical. Most importantly, dengue research must focus on understanding DENV  
334 immunity and searching for reliable protection markers [40].

335 The evaluation of effectiveness on laboratory-confirmed cases and serotype-specific infections  
336 would have the limitation that the identification of the outcome would be conditioned to a series of  
337 known and unknown factors that affect access to diagnosis. These factors can either be a consequence  
338 of consultation patterns, also associated with vaccination adherence, or be associated with  
339 immunization outcomes (manifestations and disease severity). Thus, there would be a high risk of  
340 selection bias when focusing the analysis only on confirmed ones [37]. By estimating the impact of

341 vaccination on the total PDC, which more sensitively and robustly represents the burden of the disease  
342 in the health system, these results become more relevant for planning and actions on public health.

343 **Funding:**

344 This work was supported by Sanofi Pasteur.

345 The funder of this collaborative study, participated in discussing the study's findings and  
346 reviewing the manuscript. The authors analyzed and interpreted the data and submitted the manuscript  
347 for publication.

348 **Data Availability:**

349 All relevant data are within the manuscript and its Supporting Information files.

350 **Competing interests:**

351 The authors have declared that no competing interests exist.

352 **References**

353 [1] World Health Organization. Vector-borne diseases. Available at:  
354 <https://www.who.int/news-room/fact-sheets/detail/vector-borne-diseases> . Accessed Feb 19, 2023.

355 [2] Zeng Z, Zhan J, Chen L, Chen H, Cheng S. Global, regional, and national dengue burden from  
356 1990 to 2017: A systematic analysis based on the global burden of disease study 2017.  
357 *EClinicalMedicine*. 2021;32:100712.

358 [3] Pan American Health Organization •. Epidemiological Update for Dengue, Chikungunya and  
359 Zika in 2022. Available at: [https://www3.paho.org/data/index.php/en/mnu-topics/indicadores-dengue-](https://www3.paho.org/data/index.php/en/mnu-topics/indicadores-dengue-en/annual-arbovirus-bulletin-2022.html)  
360 [en/annual-arbovirus-bulletin-2022.html](https://www3.paho.org/data/index.php/en/mnu-topics/indicadores-dengue-en/annual-arbovirus-bulletin-2022.html) . Accessed Feb 19, 2023.

361 [4] Brazilian Ministry of Health/ Health Surveillance Secretariat. Monitoramento dos casos de  
362 arboviroses urbanas transmitidas pelo *Aedes*. *Boletim Epidemiológico*. 2023;54:1–14.  
363 Available at: [https://www.gov.br/saude/pt-br/centrais-de-](https://www.gov.br/saude/pt-br/centrais-de-conteudo/publicacoes/boletins/epidemiologicos/edicoes/2023/boletim-epidemiologico-volume-54-no-01/view)  
364 [conteudo/publicacoes/boletins/epidemiologicos/edicoes/2023/boletim-epidemiologico-volume-54-no-](https://www.gov.br/saude/pt-br/centrais-de-conteudo/publicacoes/boletins/epidemiologicos/edicoes/2023/boletim-epidemiologico-volume-54-no-01/view)  
365 [01/view](https://www.gov.br/saude/pt-br/centrais-de-conteudo/publicacoes/boletins/epidemiologicos/edicoes/2023/boletim-epidemiologico-volume-54-no-01/view). Accessed Feb 19, 2023.

- 366 [5] Garcia GdA, David MR, Martins AdJ, Maciel-de-Freitas R, Linss JGB, Araújo SC, et al. The  
367 impact of insecticide applications on the dynamics of resistance: The case of four *Aedes aegypti*  
368 populations from different Brazilian regions. *PLoS Negl Trop Dis*. 2018;12(2): e0006227.
- 369 [6] Thomas SJ, Yoon IK. A review of Dengvaxia®: development to deployment. *Hum Vaccin*  
370 *Immunother*. 2019;15:2295–314.
- 371 [7] Capeding MR, Tran NH, Hadinegoro SRS, Ismail HIHM, Chotpitayasunondh T, Chua MN,  
372 et al. Clinical efficacy and safety of a novel tetravalent dengue vaccine in healthy children in Asia: A  
373 phase 3, randomised, observer-masked, placebo-controlled trial. *Lancet*. 2014;384:1358–65.
- 374 [8] Villar L, Dayan GH, Arredondo-García JL, Rivera DM, Cunha R, Deseda C, et al. Efficacy  
375 of a Tetravalent Dengue Vaccine in Children in Latin America. *N Engl J Med*. 2015;372:113–23.
- 376 [9] Hadinegoro SR, Arredondo-García JL, Capeding MR, Deseda C, Chotpitayasunondh T,  
377 Dietze R, et al. Efficacy and long-term safety of a dengue vaccine in regions of endemic disease. *N*  
378 *Engl J Med*. 2015;373:1195–206. <https://doi.org/10.1056/NEJMoa1506223>.
- 379 [10] Preto C, Maron de Mello A, Cesário Pereira Maluf EM, Teixeira Krainski E, Graeff G, de  
380 Sousa GA, et al. Vaccination coverage and adherence to a dengue vaccination program in the state of  
381 Paraná, Brazil. *Vaccine*. 2021;39:711–9.
- 382 [11] Moraes JC, Riediger IN, Crosewski F, Garrett DO, Fantinato FF, Ribeiro KB, Luna EJA. A  
383 case-control study to determine the effectiveness of a tetravalent dengue vaccine in the state of Parana.  
384 *Lancet Reg Health Am*. 2022;7:100141.
- 385 [12] Coelho GE, Leal PL, Cerroni MdP, Simplicio ACR, Siqueira JB, Jr. Sensitivity of the Dengue  
386 Surveillance System in Brazil for Detecting Hospitalized Cases. *PLoS Negl Trop Dis*. 2016;10:  
387 e0004705.
- 388 [13] Hadinegoro SRS. The revised WHO dengue case classification: Does the system need to be  
389 modified? *Paediatr Int Child Health*. 2012;32:33–8.
- 390 [14] Camargo Jr. KR, Coeli CM. Going open source: some lessons learned from the development

- 391 of OpenRecLink. *Cad Saude Publica*. 2015;31:257–63.
- 392 [15] Guia de Vigilância em Saúde, 5ª. edição. Available at: [https://www.gov.br/saude/pt-](https://www.gov.br/saude/pt-br/centrais-de-conteudo/publicacoes/svsa/vigilancia/guia-de-vigilancia-em-saude_5ed_21nov21_isbn5.pdf/view)  
393 [br/centrais-de-conteudo/publicacoes/svsa/vigilancia/guia-de-vigilancia-em-](https://www.gov.br/saude/pt-br/centrais-de-conteudo/publicacoes/svsa/vigilancia/guia-de-vigilancia-em-saude_5ed_21nov21_isbn5.pdf/view)  
394 [saude\\_5ed\\_21nov21\\_isbn5.pdf/view](https://www.gov.br/saude/pt-br/centrais-de-conteudo/publicacoes/svsa/vigilancia/guia-de-vigilancia-em-saude_5ed_21nov21_isbn5.pdf/view) . Accessed in Jan 26, 2022.
- 395 [16] R Core Team. (2020). R: A language and environment for statistical computing. R  
396 Foundation for Statistical Computing, Vienna, Austria. URL <https://www.R-project.org/>.
- 397 [17] Stata Corp (2017). Stata Statistical Software: Release 15. College Station, TX: StataCorp  
398 LLC.
- 399 [18] Olliaro P, Torreale E, Vaillant M. Covid-19 vaccine efficacy and effectiveness – the  
400 elephant (not) in the room. *Lancet Microbe*. 2021; (published online April 20.).  
401 Available at: [https://www.thelancet.com/journals/lanmic/article/PIIS2666-5247\(21\)00069-0/fulltext](https://www.thelancet.com/journals/lanmic/article/PIIS2666-5247(21)00069-0/fulltext).  
402 Accessed in Feb 19, 2023.
- 403 [17] Sharp TM, Anderson KB, Katzelnick LC, Clapham H, Johansson MA, Morrison MA, et al.  
404 Knowledge gaps in the epidemiology of severe dengue impede vaccine evaluation. *Lancet Infect Dis*.  
405 2021;12:30871-9
- 406 [18] Angelo M, Ramalho WM, Gurgel H, Bell N, Pillot E. Dengue Surveillance System in Brazil:  
407 A Qualitative Study in the Federal District. *Int J Environ Res Public Health*. 2020;2062:2-17.
- 408 [19] Sreaton G, Mongkolsapaya J. Which dengue vaccine approach is the most promising, and  
409 should we be concerned about enhanced disease after vaccination? The challenges of a dengue vaccine.  
410 *Cold Spring Harb Perspect Biol*. 2018;10(6):a029520..
- 411 [20] De Smedt T, Merrall E, Macina D, Perez-Vilar S, Andrews N, Bollaerts K. Bias due to  
412 differential and non-differential disease and exposure misclassification in studies of vaccine  
413 effectiveness. *PLoS ONE*. 2018;13:1–13.
- 414 [21] World Health Organization. Dengue vaccine: WHO position paper – July 2016. *Weekly*  
415 *Epidemiological Record*. 2016;30:349–364.

- 416 [22] Rabaa MA, Girerd-Chambaz Y, Hue KDT, Tuan TV, Wills B, Bonaparte M, et al. Genetic  
417 epidemiology of dengue viruses in phase III trials of the CYD tetravalent dengue vaccine and  
418 implications for efficacy. *ELife*. 2017;6:1–22.
- 419 [23] World Health Organization. Dengue vaccine: WHO position paper – September 2018. *Weekly  
420 Epidemiological Record*. 2018;36:457–476.
- 421 [24] Sridhar S, Luedtke A, Langevin E, Zhu M, Bonaparte M, Machabert T, et al. Effect of dengue  
422 serostatus on dengue vaccine safety and efficacy. *N Eng J Med*. 2018;379:327–40.
- 423 [25] Wilder-Smith A, Hombach J, Ferguson N, Selgelid M, O'Brien K, Vannice K, et al.  
424 Deliberations of the Strategic Advisory Group of Experts on Immunization on the use of CYD-TDV  
425 dengue vaccine. *Lancet Infect Dis*. 2019;19(1):e31-e38.
- 426 [26] Dayan GH, Langevin E, Gilbert PB, Wu Y, Moodie Z, Forrat R, et al. Assessment of the  
427 long-term efficacy of a dengue vaccine against symptomatic, virologically confirmed dengue disease  
428 by baseline dengue serostatus. *Vaccine*. 2020;38:3531–6.
- 429 [27] Carabali M, Lim JK, Velez DC, Trujillo A, Egurrola J, Lee KS, et al. Dengue virus serological  
430 prevalence and seroconversion rates in children and adults in Medellin, Colombia: implications for  
431 vaccine introduction. *Int J Infect Dis*. 2017;58:27–36.
- 432 [28] Chiaravalloti-Neto F, Da Silva RA, Zini N, Da Silva GCD, Da Silva NS, Parra MCP, et al.  
433 Seroprevalence for dengue virus in a hyperendemic area and associated socioeconomic and  
434 demographic factors using a cross-sectional design and a geostatistical approach, state of São Paulo,  
435 Brazil. *BMC Infect Dis*. 2019;19:1–14.
- 436 [29] Sabchareon A, Wallace D, Sirivichayakul C, Limkittikul K, Chanthavanich P, Suvannadabba  
437 S, et al. Protective efficacy of the recombinant, live-attenuated, CYD tetravalent dengue vaccine in  
438 Thai schoolchildren: A randomised, controlled phase 2b trial. *Lancet*. 2012;380(9853):1559-67.  
439 doi: 10.1016/S0140-6736(12)61428-7.
- 440 [30] Juraska M, Magaret CA, Shao J, Carpp LN, Fiore-Gartland AJ, Benkeser D, et al. Viral



- 441 genetic diversity and protective efficacy of a tetravalent dengue vaccine in two phase 3 trials. Proc  
442 Natl Acad Sci U S A. 2018;115:E8378–87.
- 443 [31] Torresi J, Richmond PC, Heron LG, Qiao M, Marjason J, Starr-Spires L, et al. Replication  
444 and Excretion of the Live Attenuated Tetravalent Dengue Vaccine CYD-TDV in a Flavivirus-Naive  
445 Adult Population: Assessment of Vaccine Viremia and Virus Shedding. J Infect Dis. 2017;216:834–  
446 41.
- 447 [32] Henein S, Adams C, Bonaparte M, Moser JM, Munteanu A, Baric R, et al. Dengue vaccine  
448 breakthrough infections reveal properties of neutralizing antibodies linked to protection. J Clin Invest.  
449 2021;131(13):e147066.
- 450 [33] Raut R, Corbett KS, Tennekoon RN, Premawansa S, Wijewickrama A, Premawansa G, et al.  
451 Dengue type 1 viruses circulating in humans are highly infectious and poorly neutralized by human  
452 antibodies. Proc Natl Acad Sci U S A. 2019;116(1):227-232.
- 453 [34] Martinez DR, Yount B, Nivarthi U, Munt JE, Delacruz MJ, Whitehead SS, et al. Antigenic  
454 Variation of the Dengue Virus 2 Genotypes Impacts the Neutralization Activity of Human Antibodies  
455 in Vaccines. Cell Rep. 2020;33:108226.
- 456 [35] de Jesus JG, Dutra KR, Sales FC da S, Claro IM, Terzian AC, Candido D da S, et al. Genomic  
457 detection of a virus lineage replacement event of dengue virus serotype 2 in Brazil, 2019. Mem Inst  
458 Oswaldo Cruz. 2020;115:2–7.
- 459 [36] Harapan H, Anwar S, Setiawan AM, Sasmono RT. Dengue vaccine acceptance and associated  
460 factors in Indonesia: A community-based cross-sectional survey in Aceh. Vaccine. 2016;34:3670–5.
- 461 [37] Hadisoemarto PF, Castro MC. Public Acceptance and Willingness-to-Pay for a Future Dengue  
462 Vaccine: A Community-Based Survey in Bandung, Indonesia. PLoS Negl Trop Dis. 2013;7(9):1-11.
- 463 [38] Panchapakesan C, Sheldenkar A, Cayabyab YM, Ng JS, Lu J, Lwin MO. A comparison  
464 between the predictors of vaccine uptake intentions for influenza and dengue. Int J Environ Res Public  
465 Health. 2018;15:1-10.



- 466 [39] Yeo HY, Shafie AA. The acceptance and willingness to pay (WTP) for hypothetical dengue  
467 vaccine in Penang, Malaysia: A contingent valuation study. *Cost Eff Resour Alloc.* 2018;16:1–10.
- 468 [40] de Silva AM, Harris E. Which Dengue Vaccine Approach Is the Most Promising, and Should  
469 We Be Concerned about Enhanced Disease after Vaccination? *The Path to a Dengue Vaccine:  
470 Learning from Human Natural Dengue Infection Studies and Vaccine Trials.* Cold Spring Harb  
471 *Perspect Biol.* 2018;10(6): a029371.
- 472 [41] Munafo MR, Tilling K, Taylor AE, Evans DM, Smith GD. Collider scope: when selection  
473 bias can substantially influence observed associations. *Int J Epidemiol.* 2018;47:226–235.
- 474
